1 **The evolutionary history of a gammaretrovirus currently colonizing the mule deer**  
2 **genome is marked by extensive recombination**

3

4

5 Lei Yang<sup>1,2</sup>, Raunaq Malhotra<sup>3</sup>, Rayan Chikhi<sup>2,3,4</sup>, Daniel Elleder<sup>1,5</sup>, Theodora Kaiser<sup>1</sup>,  
6 Jesse Rong<sup>3</sup>, Paul Medvedev<sup>2,3,4</sup> and Mary Poss<sup>1,2\*</sup>

7

8

9 <sup>1</sup> Department of Biology,

10 <sup>2</sup> Center for Comparative Genomics and Bioinformatics,

11 <sup>3</sup> Department of Computer Science and Engineering,

12 <sup>4</sup> Department of Biochemistry and Molecular Biology,

13 The Pennsylvania State University, University Park, PA 16802, USA

14 <sup>5</sup> Institute of Molecular Genetics; The Czech Academy of Sciences; Prague; Czech  
15 Republic

16

17

18 \*Corresponding author: Mary Poss (maryposs@gmail.com)

19 Current address: Department of Hematology and Oncology, University of Virginia,

20 Charlottesville, VA 22903, USA

21

22

23

24 **Abstract**

25

26 **Background:** All vertebrate genomes have been colonized by retroviruses along their  
27 evolutionary trajectory. Although it is clear that endogenous retroviruses (ERVs) can  
28 contribute important physiological functions to contemporary hosts, such benefits are  
29 attributed to long-term co-evolution of ERV and host. Newly colonized ERVs are thought  
30 unlikely to contribute to host genome evolution because germline infections are rare and  
31 because the host effectively silences them. The genomes of several outbred species  
32 including mule deer (*Odocoileus hemionus*) are currently being colonized by ERVs,  
33 which provides an opportunity to study ERV dynamics at a time when few are fixed.  
34 Here we investigate the history of cervid endogenous retrovirus (CrERV) acquisition and  
35 expansion in the mule deer genome to determine the potential impact of endogenizing  
36 retroviruses on host genomic diversity.

37

38 **Methods:** A mule deer genome was de novo assembled from short and long insert  
39 mate pair reads. Scaffolds were further assembled using reference assisted  
40 chromosome assembly (RACA) to provide spatial orientation of CrERV insertion sites  
41 and to facilitate assembly of CrERV sequences. We applied phylogenetic and  
42 coalescent approaches to non-recombinant genomes to determine CrERV evolutionary  
43 history, augmenting ancestral divergence estimates with the prevalence of each CrERV  
44 locus in a population of mule deer. Recombination history was investigated on partial  
45 genome alignments.

46

47 **Results:** The CrERV composition and diversity in the mule deer genome has recently  
48 measurably increased by horizontal acquisition of a new retroviruses lineage and  
49 because of recombination with existing CrERV. Resulting interlineage recombinants  
50 also endogenized and subsequently retrotransposed. CrERV loci are significantly closer  
51 to genes than expected if integration were random and gene proximity might explain the  
52 recent expansion by retrotransposition of one recombinant CrERV lineage.

53

54 **Conclusions:** There has been a burst of CrERV integrations during a recent retrovirus  
55 epizootic that increased genomic CrERV burden and has resulted in extensive  
56 insertional polymorphism in contemporary mule deer genomes. Recombination is a  
57 defining feature of CrERV evolutionary dynamics driven by this colonization, increasing  
58 CrERV burden and CrERV genetic diversity. These data support that retroviral  
59 colonization during an epizootic provides a burst of genomic diversity to the host  
60 population.

61

62 **Keywords:** endogenous retrovirus, ERV, recombination, genome diversity, mule deer,  
63 *Odocoileus hemionus*, CrERV

64

## 65 **Background**

66

67 Retroviruses are unique among viruses in adopting life history strategies that enable  
68 them to exist independently as an infectious RNA virus (exogenous retrovirus, XRV) [1]  
69 or as an integral component of their host germline (endogenous retrovirus, ERV) [2,3].

70 An ERV is the result of a rare infection of a germ cell by an XRV and is maintained in  
71 the population by vertical transmission. Germline colonization has been a successful  
72 strategy for retroviruses as they comprise up to 10% of most contemporary vertebrate  
73 genomes [4]. Over the evolutionary history of the species, ERV composition increases  
74 by acquisition of new germ line XRV infections, and through retrotransposition or  
75 reinfection of existing ERVs [5–8], which results in clusters of related ERVs. The ERV  
76 profile in extant species therefore reflects both the history of retrovirus epizootics and  
77 the fate of individual ERVs. Because the acquisition of retroviral DNA in a host genome  
78 has the potential to affect host phenotype [9–11], the dynamic interactions among ERVs  
79 and host could shape both retrovirus and host biology. However, the evolutionary  
80 processes in play near the time of colonization are difficult to discern based on an ERV  
81 colonization event that occurred in an ancestral species. A better understanding of both  
82 host and virus responses to recent germ line invasion might inform homeostatic  
83 changes in ERV-host regulation that are relevant to the pathogenesis of diseases in  
84 which ERV involvement has been implicated [12–17]. Fortunately, there is now  
85 evidence that retrovirus colonization is occurring in contemporary, albeit often non-  
86 model, species [18–20], allowing for investigation of ERV dynamics near the time of  
87 colonization. Our goal in this research is to investigate the evolutionary dynamics of the  
88 phylogenetically distinct ERV lineages that have sequentially colonized mule deer over  
89 the approximate million-year history of this species using the complete genome  
90 sequence of a majority of coding ERVs in the context of a draft assembly of a newly  
91 sequenced mule deer genome.

92

93 The life history strategy adopted by retroviruses indicates why this virus family has been  
94 so successful in colonizing host germline. Retroviral replication requires that the viral  
95 RNA genome be converted to DNA and then integrated into the genome of an infected  
96 cell [21]. As with many RNA viruses, the virus polymerase enzyme, reverse  
97 transcriptase (RT), is error prone, which contributes to a high mutation rate and enables  
98 rapid host adaptation. In addition, RT moves between the two RNA copies that  
99 comprise a retroviral genome [22]; this process can repair small genomic defects and  
100 increases evolutionary rates via recombination if the two strands are not identical.  
101 Retroviral DNA is called a provirus and is transported to the nucleus where it integrates  
102 into host genomic DNA using a viral integrase enzyme. The provirus represents a newly  
103 acquired gene that persists for the life of the cell and is passed to daughter cells, which  
104 for XRV are often hematopoietic cells. For a retrovirus infecting a germ cell, all cells in  
105 an organism will contain the new retroviral DNA if reproduction of the infected host is  
106 successful.

107

108 The retroviral life cycle also demonstrates how ERVs can affect host biology [10,23].  
109 ERVs require host transcription factors and RNA polymerases to bind to the retrovirus  
110 promoter, called long terminal repeats (LTRs), to produce viral transcripts and the RNA  
111 genome. Thus, the viral LTRs compete with host genes for transcription factors and  
112 polymerases [24]. A retrovirus encodes at a minimum, genes for the capsid, viral  
113 enzymes, and an envelope gene needed for cell entry, which is produced by a sub-  
114 genomic mRNA. Hence an ERV also utilizes host-splicing machinery and can alter host  
115 gene expression pattern if the site of integration is intronic [25,26]. While XRVs are

116 expressed from small numbers of somatic cells, ERVs are present in all cells and ERV  
117 transcripts and proteins can be expressed in any cell type at any stage of host  
118 development. Hosts actively silence the expression of full or partial ERV sequences by  
119 epigenetic methods [27,28] and by genes called viral restriction factors [29–33].  
120 Because there will be no record of an ERV that causes reproductive failure of the newly  
121 colonized host, ERVs in contemporary vertebrates are either effectively controlled by  
122 host actions, are nearly neutral in effects on host fitness, or potentially contribute to the  
123 overall fitness of the host [34–37].

124  
125 The coding portion of a new ERV can be eliminated from the genome through non-  
126 allelic homologous recombination (NAHR) between the LTRs, which are identical  
127 regions that flank the viral coding portion. A single LTR is left at the site of integration as  
128 a consequence of the recombination event and serves as a marker of the original  
129 retrovirus integration site [38]. Most ERV integration sites in humans are solo LTRs  
130 [39,40]. Because the efficiency of NAHR is highest between identical sequences [41],  
131 conversion of a full-length ERV to a solo LTR likely arises early during ERV residency in  
132 the genome before sequence identity of the LTR is lost as mutations accrue [42].  
133 Because mutations are reported to arise in ERVs at the neutral mutation rate of the host  
134 [43], sequence differences between the 5' and 3' LTR of an ERV have been used to  
135 approximate the date of integration [44,45].

136  
137 Although in humans most ERV colonization events occurred in ancestral species,  
138 acquisition of new retroviral elements is an ongoing [46,47] or contemporary [18] event  
139 in several animal species. The consequences of a recent ERV acquisition are important

140 to the host species because it creates an insertionally polymorphic site; the site is  
141 occupied in some individuals but not in others. All ERVs are insertionally polymorphic  
142 during the trajectory from initial acquisition to fixation or loss in the genome. Indeed, the  
143 HERV-K (human endogenous retrovirus type K) family is insertionally polymorphic in  
144 humans [48–51] and HERV-K prevalence at polymorphic sites differ among global  
145 populations [52]. Phylogenetic analyses of the ERV population in a genome can inform  
146 on the origins of ERV lineages to determine which are actively expanding in the genome  
147 and the mutational processes that drive evolution. These data indicate if expansion is  
148 related to the site of integration or a feature of the virus, or both and coupled with  
149 information of ERV prevalence at insertionally polymorphic sites, can inform ERV  
150 effects on host phenotype.

151  
152 To this end, we explored the evolutionary history of the mule deer (*Odocoileus*  
153 *hemionus*) ERV (Cervid endogenous retrovirus, CrERV) because we have extensive  
154 data for prevalence of CrERV loci in northern US mule deer populations [53] and  
155 preliminary data on CrERV sequence variation and colonization history [19,54]. A  
156 majority of CrERV loci is insertionally polymorphic in mule deer; 90% of animals shared  
157 fewer than 10 of approximately 250 CrERV integrations per genome in one study [53].  
158 Further, mule deer appear to have experienced several recent retrovirus epizootics with  
159 phylogenetically distinct CrERV and, because none of the CrERV loci occupied in mule  
160 deer are found in the sister species, white-tailed deer (*Odocoileus virginianus*) [19], all  
161 endogenization events have likely occurred since the split of these sister taxa. Based on  
162 the phylogeny of several CrERV identified in the mule deer genome, at least four

163 distinct epizootics resulted in germ line colonization [54]. A full-length retrovirus  
164 representing the youngest of the CrERV lineages was recovered by co-culture on  
165 human cells, indicating that some of these CrERV are still capable of infection [55]. In  
166 this study, we expand on these preliminary data by sequencing a mule deer genome  
167 and conducting phylogenetic analyses on a majority of reconstructed CrERV genomes.  
168 Our results demonstrate that expression and recombination of recently acquired CrERV  
169 with older CrERV have increased CrERV burden and diversity and consequently have  
170 increased contemporary mule deer genome diversity.

171

## 172 **Results**

173

### 174 Establishing a draft mule deer reference genome to study CrERV evolution and 175 integration site preference

176 We developed a draft assembly of a mule deer genome from animal MT273 in order to  
177 determine the sequence at each CrERV locus for phylogenetic analyses and to  
178 investigate the effect of CrERV lineage or age on integration site preference. ERV  
179 sequences are available in any genome sequencing data because a retrovirus  
180 integrates a DNA copy into the host genome. However, there is extensive homology  
181 among the most recently integrated ERVs making them difficult to assemble and  
182 causing scaffolds to break at the site of an ERV insertion [56]. We assembled scaffolds  
183 using a combination of high coverage Illumina short read whole genome sequencing  
184 (WGS) and long insert mate pair sequencing. Our *de novo* assembly yielded an ~3.31  
185 Gbp draft genome with an N50 of 156 Kbp (Table S1), which is comparable to the 3.33



186 Gbp (c-value of 3.41 pg) experimentally-determined genome size of reindeer (*Rangifer*  
187 *tarandus*) [57,58].

188

189 Approximately half of CrERV loci are located at the ends of scaffolds based on mapping  
190 our previously published junction fragment sequences [53], which is consistent with the  
191 fact that repetitive elements such as ERVs break scaffolds. To determine the sequence  
192 of these CrERVs and the genome context in which they are found, we developed a  
193 higher order assembly using reference assisted chromosome assembly (RACA) [59].  
194 RACA further scaffolds our *de novo* mule deer assembly into ‘chromosome fragments’  
195 by identifying synteny blocks among the mule deer scaffolds, the reference species  
196 genome (cow), and the outgroup genome (human) (Figure 1A). We created a series of  
197 RACA assemblies based on scaffold length to make efficient use of all data (Table S1).  
198 RACA150K takes all scaffolds greater than 150,000 bp as input and yielded 41  
199 chromosome fragments, 35 of which are greater than 1.5 Mbp; this is consistent with  
200 the known mule deer karyotype of  $2n=70$  [60]. However, RACA150K only incorporates  
201 48% of the total assembled sequences (1.59 Gbp) because of the scaffold size  
202 constraint. In contrast, RACA10K uses all scaffolds 10,000 bp or longer and increases  
203 the assembly size to 2.37 Gbp (~72% of total assembly) but contains 658 chromosome  
204 fragments (Table S1). The majority of scaffolds that cannot be incorporated into a  
205 RACA assembly are close to the ends of alignment chains (File S1, section 1a). Most  
206 sequences not represented in any assemblies were repeats based on *k-mer* analyses  
207 (File S1, section 1a and Figure S1).

208

209 Some scaffolds were excluded from the RACA assemblies, presumably because there  
210 is no synteny between cow and human for these sequences. We oriented these  
211 scaffolds using the cow-mule deer and sheep-mule deer alignments (RACA+, Table  
212 S2). Approximately 124 Mbp of sequence (~4% of total assembly) is in scaffolds larger  
213 than 10kb but cannot be placed in RACA10K, nearly all of which can be found on the  
214 mule deer-cow alignment chain and the mule deer-sheep (oviAri3) alignment chain (123  
215 Mbp in each chain). Because there is overlap between these alignments, only ~1 Mbp is  
216 specific to cow and ~1 Mbp is specific to sheep. Therefore, RACA+ incorporated all but  
217 69 scaffolds that are greater than 10 kbp, which consisted of 1.17 Mbp of sequence  
218 (~0.04% of total scaffold size of the assembly) and yields an assembly size of 2.49 Gbp  
219 (Table S1).

220

221 To enable the investigation of CrERV integration site preference relative to host genes,  
222 we annotated the mule deer scaffolds. We used Maker2 [61,62] for the annotation,  
223 which detects candidate genes based on RNA sequencing data and protein homology  
224 to any of the three reference genomes: human, cow and sheep. After four Maker  
225 iterations, 21,598 genes with an AED (annotation edit distance) [61] of less than 0.8  
226 were annotated (Table S3). Approximately 92% of genes are found on RACA150K  
227 scaffolds and 95% of genes are represented in RACA10K scaffolds.

228

### 229 Establishing the location and sequence at CrERV loci

230 Several lines of evidence suggest that most CrERVs are missing from the assemblies.  
231 Only three CrERVs with coding potential were assembled by the *de novo* assembly.

232 The *k-mer* based analysis shows that less than 9.62% of all LTR repeat elements are in  
233 the assemblies (Table S4). The CrERV-host junction fragments previously sequenced  
234 [53] support that CrERV loci are near scaffold ends or in long stretches of 'N's.  
235 Therefore, we took advantage of the different chromosome fragments generated by  
236 RACA10K, RACA150K and RACA+ and the long insert mate pair sequencing data to  
237 reconstruct CrERVs at each locus (Figure 1B). We identified 252 CrERV loci in the  
238 MT273 genome, which is consistent with our estimates of an average of 240 CrERV loci  
239 per mule deer by quantitative PCR [19] and 262 CrERV loci in animal MT273 by  
240 junction fragment analysis [53]. The majority of CrERV loci (206/252) contains CrERVs  
241 with some coding capacity and 46 are solo LTRs. Of the 206 CrERVs containing genes,  
242 164 were sufficiently complete to allow phylogenetic analysis on the entire genome or, if  
243 a deletion was present, on a subset of viral genes; at 42 loci we were unable to obtain  
244 sufficient lengths of high-quality data for further analyses.

245

#### 246 Evolutionary history of CrERV

247 We previously showed that mule deer genomes have been colonized multiple times  
248 since the ancestral split with white tailed deer approximately one million years ago  
249 (MYA) [54] because none of the CrERV integration sites are found in white-tailed deer.  
250 To better resolve the colonization history, we conducted a coalescent analysis based on  
251 an alignment spanning position 1,477-8,633 bp (omitting a portion of *env*) of the CrERV  
252 genome (GenBank: JN592050) using 34 reconstructed CrERV sequences with high  
253 quality data that had no signature of recombination and that were representative of the  
254 phylogeny in a larger data set (Figure 2). The majority of the *env* gene, which has

255 distinct variable and conserved region [63], was manually blocked because of alignment  
256 difficulties (6,923-7,503 bp by JN592050 coordinates; see Figure 2, right panel for  
257 diagram of *env* variable regions and Table S5, column C for *env* structure of each  
258 CrERV). This tree shows four well-supported CrERV lineages, each diverged from a  
259 common ancestor at several points since the split of mule deer and white-tailed deer.  
260 Although *env* sequence is not included in the phylogenetic analysis, CrERV assigned to  
261 each of the four identified lineages share the same distinct *env* variable region structure  
262 of insertions and deletions, which define the receptor-binding domain of the envelope  
263 protein (Figure 2, right panel).

264  
265 Lineage A CrERVs are the youngest ERV family in mule deer. Our estimates indicate  
266 that Lineage A colonization has occurred over the last 300 thousand years to the  
267 present (Figure 2; Table S6, node f, 95% high posterior density (HPD) interval 110-470  
268 thousand years ago (KYA)) and is represented by three well-supported CrERV  
269 subgroups evolving over this time frame. All have a complete open reading frame (ORF)  
270 in *env* and likely represent a recent retrovirus epizootic. An infectious virus recovered by  
271 co-culture belongs to this lineage [19]. Lineage A represents 30% of all CrERV sampled  
272 from MT273 (Table S5). Our age estimates for each subgroup of Lineage A CrERV are  
273 consistent with their prevalence in populations of mule deer in the Northern Rocky  
274 Mountain ecosystem (Figure 2); [64]. For example, S29996 and S10113 are estimated  
275 to derive from an older Lineage A CrERV subgroup and occur in our sampled mule deer  
276 at higher prevalence than those estimated to have entered the genome more recently  
277 (see S22897 and S111665, Figure 2).

278

279 Lineage B CrERV shared a common ancestor with Lineage A approximately 300 KYA  
280 (node i, Figure 2). Lineage B CrERVs have a short insertion in the 5' portion of *env*  
281 followed by a deletion that removes most of the *env* surface unit (SU) relative to  
282 Lineage A *env*. Because our coalescent analysis does not include *env* sequence, these  
283 results suggest that two phylogenetically distinct XRV with different envelope proteins  
284 were circulating about the same time in mule deer populations. Lineage B CrERV  
285 represent 32% of sampled viruses from our sequenced genome (Table S5). Like  
286 Lineage A, the prevalence of CrERV from Lineage B among mule deer in the northern  
287 Rockies region is low, reflecting their more recent colonization of the mule deer  
288 genome. Indeed, six Lineage B CrERVs were identified only in MT273, while only one  
289 Lineage A CrERV is found only in MT273 (Table S5), which could be indicative of a  
290 recent expansion of some Lineage B CrERV. Of note, there are two related groups of  
291 CrERV affiliated with Lineage B (Lineage B1 and B2, Table S5). One shares the short 5'  
292 insertion in *env* but has a full-length *env* with an additional short insertion relative to the  
293 *env* of Lineage A CrERV (Lineage B1, Figure 2). CrERV with this *env* configuration  
294 represent 9% of coding CrERV in MT273. Because the prevalence of Lineage B1 is  
295 high in mule deer, this group could represent the ancestral state for Lineage B CrERVs.  
296 The second group has a unique *env* not found in any other CrERV lineages (Lineage  
297 B2, Figure 2, node k; S16113 and S6404). We are unable to estimate the prevalence of  
298 this unusual *env* containing CrERV in mule deer because the host junction fragments  
299 are not represented in our draft mule deer assembly. It is possible that these viruses  
300 represent a cross-species infection and it would be interesting to determine if

301 representatives of Lineage B2 are found in the genomes of other species that occupied  
302 the ecosystem in the past.

303

304 Our coalescent estimates indicate that Lineage C CrERV emerged about 500 KYA  
305 (Table S6). Several members of this lineage are found in all mule deer sampled (Figure  
306 2; Table S5), consistent with a longer residence in the genome. There is a 59 bp  
307 insertion (C) and 362 bp deletion (E) in *env* (Figure 2; Table S5) compared to the full  
308 length *env* of Lineage A; none have an intact *env* ORF. Despite evidence that Lineage  
309 C is an older CrERV, the approximately 13% of identified CrERV in MT273 belonging to  
310 this lineage share a common ancestor ~50 KYA (95% HPD: 16-116 KYA, Table S6).  
311 These data are consistent with a recent expansion of a long-term resident CrERV.

312

313 The first representatives of the CrERV family still identifiable in mule deer colonized  
314 shortly after their split from white-tailed deer, approximately one MYA [19]. Lineage D  
315 CrERVs comprise 12% of reconstructed CrERV in MT273 and appear to be near  
316 fixation. Indeed, all mule deer in a larger survey of over 250 deer had CrERV S26536,  
317 which is not found in white-tailed deer [54]. This lineage shares an *env* insertion with  
318 Lineage C but lacks the deletion, which removes the transmembrane region of *env*.

319

320 These data expand our previous findings that over the approximately one million year  
321 history of mule deer, the mule deer genome has been colonized at least four times by  
322 phylogenetically distinct CrERVs; this likely reflects several retroviral epizootics each  
323 characterized by a unique *env* structure. The two lineages responsible for most recent

324 endogenization events comprise 62% of sampled CrERV. In addition, these data  
325 capture the evolutionary processes acting on the *env* gene of exogenous retroviruses,  
326 which are characterized by gain or loss of variable regions of this important viral protein.

327

### 328 Recombination among CrERV lineages

329 Our coalescent estimates (Figure 2) indicate that two phylogenetically distinct CrERV  
330 lineages have been expanding in contemporary mule deer genomes over the last  
331 100,000 years. Both lineages have been actively colonizing contemporary mule deer  
332 genomes based on divergence estimates, which include zero. While CrERVs  
333 represented by Lineage A are capable of infection [19], all Lineage B CrERVs have an  
334 identical deletion of the SU portion of *env* and should not be able to spread by  
335 reinfecting germ cells. However, the mule deer genome is comprised of approximately  
336 equal percentages of Lineage B and Lineage A CrERVs so we considered two modes  
337 by which defective Lineage B CrERVs could expand in the genome at a similar rate with  
338 Lineage A. Firstly, ERVs that have lost *env* are proposed to preferentially expand by  
339 retrotransposition [65] because a functional envelope is not necessary for intracellular  
340 replication. Secondly, we consider that Lineage B CrERVs could increase in the  
341 genome by infection if the co-circulating Lineage A group provided a functional  
342 envelope protein, a process called complementation [5,66]. This latter mechanism  
343 requires that a member of each CrERV lineage be transcriptionally active at the same  
344 time in the same cell, and that intact proteins from the ‘helper’ genome be used to  
345 assemble a particle with a functional envelope for reinfection. If two different CrERV loci  
346 are expressed in the same cell, both genomes could be co-packaged in the particle.

347 Because the reverse transcriptase moves between the two RNA genomes as first  
348 strand DNA synthesis proceeds, evidence of inter-lineage recombination would support  
349 that the molecular components necessary for complementation were in place. We  
350 assessed Lineage B CrERV for recombination with Lineage A to determine if coincident  
351 expression of the RNA genomes of these two lineages could explain the expansion by  
352 infection through complementation of the *env*-less Lineage B CrERV.

353

354 There is good support for recombination between Lineage A and B in a region spanning  
355 a portion of *pol* to the beginning of the variable region in *env* (4,422-7,076 based on  
356 coordinates of JN592050). In this region, several CrERV that we provisionally classified  
357 as Lineage B because they carried the prototypical *env* deletion of SU form a  
358 monophyletic group that is affiliated with Lineage A CrERV (Figure 3, upper collapsed  
359 clade containing orange diamonds). These Lineage B recombinants all share the same  
360 recombination breakpoint just 5' of the characteristic short insertion for these viruses  
361 (Figure S2, indicated by "\*\*\*"; Table S7). In addition, several other CrERVs with Lineage  
362 B *env* branch between lineages A and B, indicating that the recombination breakpoints  
363 fall within the region assessed (Figure S2). Indeed, the breakpoint in a group of three  
364 CrERV is at position 6630 based on coordinates of JN592050, which is near the  
365 predicted splice site for *env* at position 6591 [19]; this confers an additional 500 bp of  
366 the Lineage B *env* on these viruses (Figure S2) resulting in their observed phylogenetic  
367 placement. Because recombination between the two retroviral RNA genomes occurs  
368 during reverse transcription, our data indicate that both Lineage A and B CrERVs were  
369 expressed and assembled in a particle containing a copy of each genome. A functional



370 envelope from Lineage A would therefore have been available for infection. These data  
371 support our premise that complementation with a replication competent Lineage A  
372 CrERV or CrXRV (cervid exogenous gammaretrovirus, an exogenous version of  
373 CrERV) contributes to the 32% prevalence of *env*-deleted Lineage B CrERV in the  
374 genome. It is notable that recent retrotransposition of the lineage A-B recombinant  
375 CrERVs likely occurred because they are nearly identical and the branches supporting  
376 them are short (Figure 3, orange diamonds in the Lineage A type *env* cluster).

377

378 There is additional data to support the transcriptional activity of a Lineage B CrERV,  
379 which is requisite for recombination with an infectious Lineage A CrERV or for  
380 retrotransposition. We identified a non-recombinant Lineage B CrERV (S24870 in Table  
381 S5) with extensive G to A changes (184 changes) compared to other members of this  
382 monophyletic group. These data are indicative of a cytidine deaminase acting on the  
383 single stranded DNA produced during reverse transcription [67].

384

385 Lineage C CrERV are enigmatic because based on full length sequences lacking a  
386 signature of recombination it diverged around 500KYA (Figure 2) but all extant  
387 members of this group diverged recently. From Figure 3, it is evident that over the  
388 region of *pol* assessed, CrERVs containing the Lineage C *env* cluster with an older  
389 Lineage A subgroup. Given that the *env* of Lineage C CrERV shares sequence  
390 homology and an insertion with that of the oldest Lineage D, it is likely that Lineage C is  
391 in fact the result of recombination between an early member of Lineage A and a relative  
392 of a Lineage D CrERV. Many, but not all, Lineage C CrERVs are found at high

393 prevalence in the mule deer population (Figure 2; Table S5), supporting that the initial  
394 recombination event occurred early during the Lineage A colonization. Our identification  
395 of Lineage C as derived from a non-recombinant CrXRV is therefore incorrect. Instead,  
396 Lineage C CrERVs are derived from a CrERV or CrXRV that is not currently  
397 represented in mule deer genomes either because it was lost or it never endogenized.  
398 Fourteen of the twenty-two CrERV in Lineage C have multiple signatures of  
399 recombination predominantly with Lineage A CrERV. The expansion of a subset of  
400 Lineage C as a monophyletic group approximately 50 KYA (Figure 2; Table S6)  
401 suggests that like some members of Lineage B, CrERVs generated by recombination  
402 with Lineage A have recently retrotransposed.

403

#### 404 Genomic distribution of CrERV lineages

405 Of the 164 CrERV that we reconstructed from MT273, only 12 can be detected in all  
406 mule deer that we have sampled [53,54] (Table S5). This means that the majority of  
407 CrERV loci in mule deer are insertionally polymorphic; not all animals will have a CrERV  
408 occupying a given locus. ERVs can impact genome function in multiple ways but the  
409 best documented is by altering host gene regulation, which occurs if the integration site  
410 is near a host gene [68]. Thus, we investigated the spatial distribution of CrERV loci  
411 relative to host genes to determine the potential of either fixed or polymorphic CrERV to  
412 impact gene expression, which could affect host phenotype.

413

414 The actual distance between genes is likely to be unreliable in our assembly because  
415 most high copy number repeats are missing in the mule deer assembly (Figure S1,

416 Table S4, section 1a of File S1). To investigate potential problems determining the  
417 spatial distribution of CrERV insertions imposed by using a draft assembly, we  
418 simulated the distribution of retrovirus insertions (File S1, section 2I) in mule deer  
419 (scaffold N50=156 Kbp) and the genomes of cow (Btau7, scaffold N50=2.60 Mbp) and  
420 human (hg19, scaffold N50=46.4 Mbp). The mean distance between insertion and the  
421 closest gene for all simulation replicates (Figure S3) is significantly higher in the cow  
422 and human (Mann-Whitney U test  $p < 2.2 \times 10^{-16}$  for any pair of comparison among the  
423 three species). Therefore, we determined if the number of CrERV loci observed to be  
424 within 20Kbp of a gene differed from that expected if the distribution was random. There  
425 are significantly more observed insertions that fall within 20 Kbp of the translation start  
426 site of a gene than occur randomly (Figure 4A). In contrast, intronic CrERV insertions  
427 are significantly less than expected based on our simulations (Figure 4B). Among  
428 Lineage A CrERVs, only a single sub-lineage (CrERVs that are associated to node 'a' in  
429 Figure 2) are found in closer proximity to genes (bold font in Column G of Table S5)  
430 than expected if integrations are random (Fisher's exact test  $p = 0.002891$ ). We also  
431 investigated whether any of the recombinant CrERV with a signature of recent  
432 expansion was integrated within 20 Kbp of a gene. Two of the three recombinant  
433 clusters (Figure 3) contain members that are close to a gene (Table S5, bold font in  
434 column G). In particular, Lineage A/B recombinant CrERV S10 is 494 bp from the start  
435 of a gene. Remarkably, four Lineage C CrERVs with the typical *env* sequence are within  
436 20 Kbp of a gene (Table S5, bold font in column G). Our data indicate that integration  
437 site preference overall favors proximity to genes but that this is not reflected in all  
438 lineages. In particular, the history of Lineage C CrERV suggests they could have

439 acquired a different integration site preference through recombination that facilitated  
440 recent genome expansion.

441

## 442 **Discussion**

443

444 The wealth of data on human ERVs (HERVs) provides the contemporary status of  
445 events that initiated early in hominid evolution. Potential impacts of an ERV near the  
446 time of colonization on a host population is thought to be minimal because infection of  
447 host germ line by an XRV is a rare event and ERVs that affect host fitness are quickly  
448 lost. Potentially deleterious ERVs that are not lost due to reproductive failure can be  
449 removed by recombination leaving a solo LTR at the integration site or can suffer  
450 degradation presumably because there is no benefit to retain function at these loci;  
451 most HERVs are represented by these two states. In addition, humans and other  
452 vertebrate hosts have invested extensive genomic resources [4,9,69] to control the  
453 expression of ERVs that are maintained. The dynamics between host and ERV are  
454 described as an evolutionary arms race [70,71]. This narrative may underrepresent any  
455 contributions of ERVs to fitness as they were establishing in a newly colonized host  
456 population. Because there are now several species identified to be at different points  
457 along the evolutionary scale initiated by the horizontal acquisition of retroviral DNA it is  
458 possible to investigate dynamics of ERV that are not yet fixed in a contemporary  
459 species. Considering the numerous mechanisms by which newly integrated retroviral  
460 DNA affect host biology, such as by introducing new hotspots for recombination [72],  
461 altering host gene regulation [68,73,74], and providing retroviral transcripts and proteins

462 for host exaptation [75–78], colonizing ERVs could make a substantive contribution to  
463 species' evolution. Our research on the evolutionary dynamics of mule deer CrERV  
464 demonstrates that genomic CrERV content and diversity increased significantly during a  
465 recent retroviral epizootic due to acquisition of new XRV and from endogenization and  
466 retrotransposition of recombinants generated between recent and older CrERVs. These  
467 data suggest that CrERV provide a pulse of genetic diversity, which could impact this  
468 species' evolutionary trajectory.

469  
470 Our analyses of CrERV dynamics in mule deer are based on the sequence of a majority  
471 of coding CrERVs in MT273. Of the 252 CrERV loci identified in the MT273 assembly,  
472 we were able to reconstruct CrERV sequences from long insert mate pair and Sanger  
473 sequencing to use for phylogenetic analysis at 164 sites; 46 sites were solo LTR and 42  
474 were occupied by CrERV retaining some coding capacity. We complimented  
475 phylogenetic analyses with our previous data on the frequency of each CrERV locus  
476 identified in MT273 in a population of mule deer in the northern Rocky Mountain  
477 ecosystem [53,64]. In addition, we incorporated information on the variable structure of  
478 the retroviral envelope gene, *env*, which is characteristic of retrovirus lineages but was  
479 excluded from phylogenetic analyses. The variable regions of retroviral *env* result from  
480 balancing its role in receptor-mediated, cell specific infection while evading host  
481 adaptive immune response [79,80]. Despite excluding most of *env* from our phylogenetic  
482 analysis because of alignment problems, each of the lineages we identified has a  
483 similar distinct *env* structure, as is well known for infectious retroviruses. By integrating  
484 population frequency, coalescent estimation, and the unique structural features of *env*

485 we provide an integrated approach to explore the evolutionary dynamics of an  
486 endogenizing ERV.

487

488 The most recent CrERV epizootic recorded by germline infection was coincident with  
489 the last glacial period, which ended about 12 KYA. The retroviruses that endogenized  
490 during this epizootic belong to Lineage A, have open reading frames for all genes and  
491 have been recovered by co-culture as infectious viruses [55]. There are several sub-  
492 lineages within Lineage A, which likely reflect the evolutionary history of CrXRV  
493 contributing to germline infections over this time period. Lineage A retroviruses  
494 constitute approximately one third of all retroviral integrations in the genome. Only four  
495 of the fifty Lineage A CrERV that we were able to reconstruct did not have a full length  
496 *env*. An important implication of this result is that over the most recent approximately  
497 100,000 years of the evolution of this species, the mule deer genome acquired up to  
498 half a megabase of new DNA, which introduced new regulatory elements with promoter  
499 and enhancer capability, new splice sites, and sites for genome rearrangements. Thus,  
500 there is a potential to impact host fitness through altered host gene regulation even if  
501 host control mechanisms suppress retroviral gene expression. None of the Lineage A  
502 CrERV is fixed in mule deer populations (Table S5, column F) so any effect of CrERV  
503 on the host will not be experienced equally in all animals. However, none of the Lineage  
504 A CrERV is found only in M273 indicating that the burst of new CrERV DNA acquired  
505 during the most recent epizootic has not caused reproductive failure among mule deer.  
506 These data demonstrate that in mule deer, a substantial accrual of retroviral DNA in the

507 genome can occur over short time spans in an epizootic and could impose differential  
508 fitness in the newly colonized population.  
509  
510 Lineage A CrERV has an open reading frame for *env* but Lineages B-D do not. Lineage  
511 B CrERVs are intriguing in this regard because they also constitute approximately a  
512 third of the CrERV in the genome. Yet all have identical deletions of the extracellular  
513 portion of *env*, which should render them incapable of genome expansion by reinfection.  
514 ERV that have deleted *env* are reportedly better able to expand by retrotransposition  
515 [65], which could account for the prevalence of Lineage B. However, because we have  
516 evidence for recent expansion of Lineage A and B recombinants, we considered an  
517 alternative explanation; that *env*-deficient Lineage B CrERV was complemented with an  
518 intact Lineage A CrERV envelope glycoprotein allowing for germline infection.  
519 Complementation is not uncommon between XRV and ERV [81,82], is well established  
520 for murine Intracisternal A-type Particle (IAP) [83] and has been reported for ERV  
521 expansion in canids [84]. Complementation requires that two different retroviruses are  
522 co-expressed in the same cell [85]. During viral assembly functional genes supplied by  
523 either virus are incorporated into the virus particle and either or both retroviral genomes  
524 can be packaged. Because the retroviral polymerase uses both strands of RNA during  
525 reverse transcription to yield proviral DNA, a recombinant can arise if the two co-  
526 packaged RNA strands are not identical. We investigated the possibility of  
527 complementation by searching for Lineage A-B recombinants. Our data show that  
528 Lineage A and B recombination has occurred several times. A group of CrERV that  
529 encode a Lineage B *env* cluster with Lineage A CrERV in a phylogeny based on a

530 partial genome alignment (JN592050: 4422-7076bp). The recombinant breakpoint  
531 within this monophyletic group is identical, suggesting that the inter-lineage recombinant  
532 subsequently expanded by retrotransposition. Notably, two of the CrERV in this  
533 recombinant cluster were only found in M273, indicating that retrotransposition was a  
534 recent event. There are other clusters of CrERV with Lineage B *env* affiliated with  
535 Lineage A CrERV that have different breakpoints in this partial phylogeny.  
536 Recombination between an XRV and ERV is also a well-documented property of  
537 retroviruses [86–88]. However, the recombinant retroviruses that result are typically  
538 identified because they are XRV and often associated with disease or a host switch.  
539 Our data indicate that multiple recombination events between Lineage A and B CrERV  
540 have been recorded in germline; this in itself is remarkable given that endogenization is  
541 a rare event. Thus both the burden of CrERV integrations and the sequence diversity of  
542 CrERV in the mule deer genome increase concomitant with a retrovirus epizootic by  
543 CrERV inter-lineage recombination.

544  
545 Recombination is a dominant feature of CrERV dynamics and is also displayed in the  
546 evolutionary history of Lineage C CrERV. Our phylogenetic analysis places the ancestor  
547 of Lineage C CrERV at 500 KYA and indeed, Lineage C and Lineage D, which is  
548 estimated to be the first CrERV to colonize mule deer after splitting from white-tailed  
549 deer [19,54], share many features in *env* that are distinct from those of Lineage A and  
550 B. Consistent with a long-term residency in the genome, many Lineage C CrERV are  
551 found in most or all mule deer surveyed. A recent expansion of a CrERV that has been  
552 quiescent in the genome since endogenizing could explain the estimated 50 KYA time



553 to most recent common ancestor of extant members of this lineage. Although this  
554 scenario is consistent with the paradigm that a single XRV colonized the genome and  
555 recently expanded by retrotransposition, our analysis shows that all Lineage C CrERV  
556 are recombinants of a Lineage A CrERV and a CrERV not recorded in or lost from  
557 contemporary mule deer genomes. Hence the resulting monophyletic lineage does not  
558 arise from retrotransposition of an ancient colonizing XRV. Rather, as is the case with  
559 Lineage B CrERV, recombination between an older CrERV and either a Lineage A  
560 CrXRV or CrERV occurred, infected germline, and recently expanded by  
561 retrotransposition. It is noteworthy that all retrotransposition events detectable in our  
562 data involve recombinant CrERV. Further, recombination often leads to duplications and  
563 deletions in the retroviral genome, therefore some of the deletions we document in  
564 Lineages B-D are not a consequence of slow degradation in the genome but rather are  
565 due to reverse transcription and as was recently reported for Koala retrovirus [88].

566

567 These data highlight that expansion of CrERV diversity and genomic burden has  
568 occurred in the recent evolutionary history of mule deer by new acquisitions,  
569 complementation, and pulses of retrotransposition of inter-lineage recombinants.  
570 Indeed, several of the recombinant Lineage C CrERVs that have expanded by  
571 retrotransposition are within 20kbp of a gene raising the question as to whether there is  
572 a fitness effect at these loci that is in balance with continued expression of the  
573 retrovirus. It is remarkable that so many of the events marking the dynamics of  
574 retrovirus endogenization are preserved in contemporary mule deer genomes. Given  
575 that germline infection is a rare event, it is likely that the dynamics we describe here

576 also resulted in infection of somatic cells. It is worthwhile to consider the potential for  
577 ERVs in other species, in particular in humans where several HERVs are expressed, to  
578 generate novel antigens through recombination or disruptive somatic integrations that  
579 could contribute to disease states.

580

## 581 **Methods**

582

### 583 Sequencing

584 Whole genome sequencing (WGS) was performed for a male mule deer, MT273, at  
585 ~30x depth using the library of ~260 bp insert size, ~10x using the library of ~1,400-  
586 5,000 bp insert size and ~30x using the library of ~6,600 bp insert size. 3' CrERV-host  
587 junction fragment sequencing was performed as described by Bao *et al.* [53]. 5' CrERV-  
588 host junction fragment sequencing was performed on the Roche 454 platform, with a  
589 target size of ~500bp containing up to 380 bp of CrERV LTR.

590

### 591 Assembly and mapping

592 The draft assembly of MT273 was generated using SOAPdenovo2 [89] (File S1, section  
593 2a). WGS data were then mapped back to the assembly using the default setting of bwa  
594 mem [90] for further use in RACA and CrERV reconstruction. RNA-seq data was  
595 mapped to the WGS scaffolds using the default setting of tophat [91,92]. 3' junction  
596 fragments were clustered as described in Bao *et al.* [53]. 3' junction fragment clusters  
597 and 5' junction fragment reads were mapped to the WGS assembly using the default  
598 setting of blat [93]. A perl script was used to filter for the clusters or reads whose host

599 side of the fragment maps to the host at its full length and high identity. 5' junction  
600 fragments were then clustered using the default setting of bedtools merge.

601

## 602 RACA

603 Synteny based scaffolding using RACA was performed based on the genome alignment  
604 between the mule deer WGS assembly, a reference genome (cow, bosTau7 or Btau7),  
605 and an outgroup genome (hg19). Genome alignments were performed with lastz [94]  
606 under the setting of '--notransition --step=20', and then processed using the UCSC  
607 axtChain and chainNet tools. The mule deer-cow-human phylogeny was derived from  
608 Bininda-Emonds *et al.* [95] using the 'ape' package of R.

609

## 610 CrERV sequence reconstruction

611 CrERV locations and sequences were retrieved based on junction fragment and long  
612 insert mate pair WGS data. The long insert mate pair WGS reads were mapped to the  
613 reference CrERV (GenBank: JN592050) using bwa mem. Mates of reads that mapped  
614 to the reference CrERV were extracted and then mapped to the WGS assembly using  
615 bwa mem. Mates mapped to the WGS assembly were then clustered using the 'cluster'  
616 function of bedtools. Anchoring mate pair clusters on both sides of the insertion site  
617 were complemented by junction fragments to localize CrERVs. Based on the RACA  
618 data, CrERVs that sit between scaffolds were also retrieved in this manner. CrERV  
619 reads were then assigned to their corresponding cluster and were assembled using  
620 SeqMan (DNASTAR). Sanger sequencing was performed to complement key regions

621 used in CrERV evolutionary analyses. All reconstructed CrERV sequences used in the  
622 phylogenetic analyses are included in File S2 in fasta format.

623

#### 624 CrERV evolution analyses

625 CrERV sequences of interest were initially aligned using the default setting of muscle  
626 [96], manually trimmed for the region of interest, and then re-aligned using the default  
627 setting of Prank [97]. Lineage-specific regions are manually curated to form lineage-  
628 specific blocks. Models for phylogeny were selected by AICc (Akaike Information  
629 Criterion with correction) using jModelTest [98]. Coalescent analysis and associated  
630 phylogeny (Figure 2) was generated using BEAST2 [99]. In the coalescent analysis, we  
631 used GTR substitution matrix, four Gamma categories, estimated among-site variation,  
632 Calibrated Yule tree prior with uclMean uclStddev from exponential distribution,  
633 relaxed lognormal molecular clock, shared common ancestor of all CrERVs 0.47-1 MYA  
634 as a prior [19,54]. Maximum likelihood phylogeny in Figure 3 was generated using  
635 PhyML [100] using the models selected by AICc and the setting of '-o tlr -s BEST'  
636 according to the selected model.

637

#### 638 CrERV spatial distribution

639 We simulated 274 insertions per genome to approximate the average number of  
640 CrERVs in a mule deer [53]. The simulation was performed 10,000 times on three  
641 genomes: the mule deer WGS scaffolds, cow (Btau7) and human (hg19). Distance  
642 between simulated insertions and the closest start of the coding sequence of a gene  
643 was calculated using the 'closest' function of bedtools, and the simulated insertions that

644 overlap with a gene were marked with the 'intersect' function of bedtools. Number of  
645 simulated simulations that are within 20 Kbp or intronic to a gene was counted for each  
646 of the 10,000 replicates. Counts were then normalized by the total number of insertions  
647 and plotted using the 'hist' function of R.

648

#### 649 Supplementary methods

650 Methods with extended details are available in File S1.

651

#### 652 **Availability of supporting data**

653

654 The raw sequencing data was deposited in SRR9121136. Other data generated are  
655 included in supplementary file and figures.

656

#### 657 **List of abbreviations**

658

659 ERV: endogenous retrovirus

660 XRV: exogenous retrovirus or infectious retrovirus

661 LTR: long terminal repeat

662 CrERV: cervid endogenous gammaretrovirus

663 CrXRV: cervid exogenous gammaretrovirus

664 HERV-K: human endogenous retrovirus type K

665 RACA: reference-assisted chromosome assembly

666 WGS: whole genome sequencing

667 NAHR: non-allelic homologous recombination

668 KYA: thousand years ago

669 MYA: million years ago

670 RT: reverse transcriptase

671 ORF: open reading frame

672 IAP: intracisternal A-type particle

673

674 **Author's contributions**

675 LY, RM, RC, TK, JR, PM, and MP conducted analyses; LY, RM, DE, MP interpreted  
676 data; LY and MP wrote the manuscript.

677

678 **Acknowledgements**

679 The authors would like to thank David Chen for contributions to genome analysis.

680

681 **Declarations**

682

683 **Funding**

684 This work was funded in part by USGS 06HQAG0131. The funders had no role in study  
685 design, data collection and analysis, decision to publish, or preparation of the  
686 manuscript.

687

688 **Competing interests**

689 The authors claim no competing interests.

690

691 Ethics approval and consent to participate

692 Not applicable.

693

694 Consent for publication

695 Not applicable.

696

697 **References**

698

699 1. Coffin JM. Retroviridae and their replication. Fields Virol. Lippincott-Raven; 1996. p.

700 1767–1848.

701 2. Weiss RA. The discovery of endogenous retroviruses. Retrovirology. 2006;3:67.

702 3. Löwer R, Löwer J, Kurth R. The viruses in all of us: characteristics and biological  
703 significance of human endogenous retrovirus sequences. Proc Natl Acad Sci U S A.

704 1996;93:5177–84.

705 4. Stoye JP. Studies of endogenous retroviruses reveal a continuing evolutionary saga.

706 Nat Rev Microbiol. 2012;10:395–406.

707 5. Belshaw R, Katzourakis A, Paces J, Burt A, Tristem M. High Copy Number in

708 Human Endogenous Retrovirus Families is Associated with Copying Mechanisms in

709 Addition to Reinfection. Mol Biol Evol. 2005;22:814–7.

710 6. Johnson WE. Endogenous Retroviruses in the Genomics Era. Annu Rev Virol.

711 2015;2:135–59.

712 7. Belshaw R, Pereira V, Katzourakis A, Talbot G, Paces J, Burt A, et al. Long-term

- 713 reinfection of the human genome by endogenous retroviruses. *Proc Natl Acad Sci U S*  
714 *A.* 2004;101:4894–9.
- 715 8. Boeke JD, Stoye JP. Retrotransposons, endogenous retroviruses, and the evolution  
716 of retroelements. Cold Spring Harbor Laboratory Press, Cold Spring Harbor (NY);  
717 1997;343–435.
- 718 9. Feschotte C, Gilbert C. Endogenous viruses: Insights into viral evolution and impact  
719 on host biology. *Nat Rev Genet.* 2012;13:283–96.
- 720 10. Jern P, Coffin JM. Effects of retroviruses on host genome function. *Annu Rev*  
721 *Genet.* 2008;42:709–32.
- 722 11. Kurth R, Bannert N. Beneficial and detrimental effects of human endogenous  
723 retroviruses. *Int. J. Cancer.* 2010. p. 306–14.
- 724 12. Antony JM, DesLauriers AM, Bhat RK, Ellestad KK, Power C. Human endogenous  
725 retroviruses and multiple sclerosis: Innocent bystanders or disease determinants?  
726 *Biochim Biophys Acta - Mol Basis Dis.* 2011;1812:162–76.
- 727 13. Magiorkinis G, Belshaw R, Katzourakis A. “There and back again”: revisiting the  
728 pathophysiological roles of human endogenous retroviruses in the post-genomic era.  
729 *Philos Trans R Soc Lond B Biol Sci.* 2013;368:20120504.
- 730 14. Wildschutte JH, Ram D, Subramanian R, Stevens VL, Coffin JM. The distribution of  
731 insertionally polymorphic endogenous retroviruses in breast cancer patients and cancer-  
732 free controls. *Retrovirology.* 2014;11:62.
- 733 15. Xue B, Sechi LA, Kelvin DJ. Human Endogenous Retrovirus K (HML-2) in Health  
734 and Disease. *Front Microbiol.* 2020;11.
- 735 16. Li W, Lee M, Henderson L, Tyagi R, Bachani M, Steiner J, et al. Human



- 736 endogenous retrovirus-K contributes to motor neuron disease. *Sci Transl Med*.  
737 2015;7:307ra153.
- 738 17. Li W, Yang L, Harris RS, Lin L, Olson TL, Hamele CE, et al. Retrovirus insertion site  
739 analysis of LGL leukemia patient genomes. *BMC Med Genomics*. *BMC Medical*  
740 *Genomics*; 2019;12:88.
- 741 18. Roca AL, O'Brien SP, Greenwood AD, Eiden M V., Ishida Y. Transmission,  
742 Evolution, and Endogenization: Lessons Learned from Recent Retroviral Invasions.  
743 *Microbiol Mol Biol Rev*. 2017;82:1–41.
- 744 19. Elleder D, Kim O, Padhi A, Bankert JG, Simeonov I, Schuster SC, et al. Polymorphic  
745 integrations of an endogenous gammaretrovirus in the mule deer genome. *J Virol*.  
746 2012;86:2787–96.
- 747 20. Arnaud F, Caporale M, Varela M, Biek R, Chessa B, Alberti A, et al. A Paradigm for  
748 Virus–Host Coevolution: Sequential Counter-Adaptations between Endogenous and  
749 Exogenous Retroviruses. *PLoS Pathog*. 2007;3:e170.
- 750 21. Coffin JM, Hughes SH, Varmus HE. *Retroviral Virions and Genomes--Retroviruses*.  
751 Cold Spring Harbor Laboratory Press; 1997.
- 752 22. Luo GX, Taylor J. Template switching by reverse transcriptase during DNA  
753 synthesis. *J Virol*. 1990;64:4321–8.
- 754 23. Bolinger C, Boris-Lawrie K. Mechanisms employed by retroviruses to exploit host  
755 factors for translational control of a complicated proteome. *Retrovirology*. 2009;6:8.
- 756 24. Sofuku K, Honda T. Influence of Endogenous Viral Sequences on Gene Expression.  
757 *Gene Expr Regul Mamm Cells - Transcr From Gen Asp*. InTech; 2018.
- 758 25. Kim H-S. Genomic impact, chromosomal distribution and transcriptional regulation

- 759 of HERV elements. *Mol Cells*. 2012;33:539–44.
- 760 26. Isbel L, Whitelaw E. Endogenous retroviruses in mammals: An emerging picture of  
761 how ERVs modify expression of adjacent genes. *BioEssays*. 2012;34:734–8.
- 762 27. Yao S, Sukonnik T, Kean T, Bharadwaj RR, Pasceri P, Ellis J. Retrovirus Silencing,  
763 Variegation, Extinction, and Memory Are Controlled by a Dynamic Interplay of Multiple  
764 Epigenetic Modifications. *Mol Ther*. 2004;10:27–36.
- 765 28. Hurst TP, Magiorkinis G. Epigenetic control of human endogenous retrovirus  
766 expression: Focus on regulation of long-terminal repeats (LTRs). *Viruses*. 2017;9:1–13.
- 767 29. Geis FK, Goff SP. Silencing and Transcriptional Regulation of Endogenous  
768 Retroviruses: An Overview. *Viruses*. 2020;12:884.
- 769 30. Lavie L, Kitova M, Maldener E, Meese E, Mayer J. CpG Methylation Directly  
770 Regulates Transcriptional Activity of the Human Endogenous Retrovirus Family HERV-  
771 K(HML-2). *J Virol*. 2005;79:876–83.
- 772 31. Matsui T, Leung D, Miyashita H, Maksakova IA, Miyachi H, Kimura H, et al. Proviral  
773 silencing in embryonic stem cells requires the histone methyltransferase ESET. *Nature*.  
774 2010;464:927–31.
- 775 32. Bruno M, Mahgoub M, Macfarlan TS. The Arms Race Between KRAB–Zinc Finger  
776 Proteins and Endogenous Retroelements and Its Impact on Mammals. *Annu Rev*  
777 *Genet*. 2019;53:annurev-genet-112618-043717.
- 778 33. Sze A, Olganier D, Lin R, van Grevenynghe J, Hiscott J. SAMHD1 Host Restriction  
779 Factor: A Link with Innate Immune Sensing of Retrovirus Infection. *J Mol Biol*.  
780 2013;425:4981–94.
- 781 34. Blanco-Melo D, Gifford RJ, Bieniasz PD. Co-option of an endogenous retrovirus

- 782 envelope for host defense in hominid ancestors. *Elife*. 2017;6.
- 783 35. Haig D. Retroviruses and the Placenta. *Curr Biol*. 2012;22:R609–13.
- 784 36. Fu B, Ma H, Liu D. Endogenous Retroviruses Function as Gene Expression  
785 Regulatory Elements During Mammalian Pre-implantation Embryo Development. *Int J*  
786 *Mol Sci*. 2019;20:790.
- 787 37. Göke J, Ng HH. CTRL + INSERT: retrotransposons and their contribution to  
788 regulation and innovation of the transcriptome. *EMBO Rep*. 2016;17:1131–44.
- 789 38. Hughes JF, Coffin JM. Human endogenous retrovirus K solo-LTR formation and  
790 insertional polymorphisms: implications for human and viral evolution. *Proc Natl Acad*  
791 *Sci U S A*. 2004;101:1668–72.
- 792 39. Belshaw R, Dawson ALA, Woolven-Allen J, Redding J, Burt A, Tristem M.  
793 Genomewide screening reveals high levels of insertional polymorphism in the human  
794 endogenous retrovirus family HERV-K(HML2): implications for present-day activity. *J*  
795 *Viol*. 2005;79:12507–14.
- 796 40. Subramanian RP, Wildschutte JH, Russo C, Coffin JM. Identification,  
797 characterization, and comparative genomic distribution of the HERV-K (HML-2) group of  
798 human endogenous retroviruses. *Retrovirology*. BioMed Central Ltd; 2011;8:90.
- 799 41. Hoang ML, Tan FJ, Lai DC, Celniker SE, Hoskins RA, Dunham MJ, et al.  
800 Competitive repair by naturally dispersed repetitive DNA during non-allelic homologous  
801 recombination. *PLoS Genet*. 2010;6:e1001228.
- 802 42. Belshaw R, Watson J, Katzourakis A, Howe A, Woolven-Allen J, Burt A, et al. Rate  
803 of recombinational deletion among human endogenous retroviruses. *J Virol*.  
804 2007;81:9437–42.

- 805 43. Kijima TE, Innan H. On the Estimation of the Insertion Time of LTR  
806 Retrotransposable Elements. *Mol Biol Evol.* 2010;27:896–904.
- 807 44. Johnson WE, Coffin JM. Constructing primate phylogenies from ancient retrovirus  
808 sequences. *Proc Natl Acad Sci.* 1999;96:10254–60.
- 809 45. Zhuo X, Rho M, Feschotte C. Genome-Wide Characterization of Endogenous  
810 Retroviruses in the Bat *Myotis lucifugus* Reveals Recent and Diverse Infections. *J Virol.*  
811 2013;87:8493–501.
- 812 46. Stocking C, Kozak CA. Murine endogenous retroviruses. *Cell Mol Life Sci.*  
813 2008;65:3383–98.
- 814 47. Anai Y, Ochi H, Watanabe S, Nakagawa S, Kawamura M, Gojobori T, et al.  
815 Infectious endogenous retroviruses in cats and emergence of recombinant viruses. *J*  
816 *Virol.* 2012;86:8634–44.
- 817 48. Wildschutte JH, Williams ZH, Montesion M, Subramanian RP, Kidd JM, Coffin JM.  
818 Discovery of unfixed endogenous retrovirus insertions in diverse human populations.  
819 *Proc Natl Acad Sci U S A.* 2016;113:E2326-34.
- 820 49. Soriano P, Gridley T, Jaenisch R. Retroviruses and insertional mutagenesis in mice:  
821 proviral integration at the *Mov 34* locus leads to early embryonic death. *Genes Dev.*  
822 1987;1:366–75.
- 823 50. Moyes D, Griffiths DJ, Venables PJ. Insertional polymorphisms: a new lease of life  
824 for endogenous retroviruses in human disease. *Trends Genet.* 2007;23:326–33.
- 825 51. Turner G, Barbulescu M, Su M, Jensen-Seaman MI, Kidd KK, Lenz J. Insertional  
826 polymorphisms of full-length endogenous retroviruses in humans. *Curr Biol.*  
827 2001;11:1531–5.

- 828 52. Li W, Lin L, Malhotra R, Yang L, Acharya R, Poss M. A computational framework to  
829 assess genome-wide distribution of polymorphic human endogenous retrovirus-K In  
830 human populations. Wilke CO, editor. PLOS Comput Biol. 2019;15:e1006564.
- 831 53. Bao L, Elleder D, Malhotra R, DeGiorgio M, Maravegias T, Horvath L, et al.  
832 Computational and Statistical Analyses of Insertional Polymorphic Endogenous  
833 Retroviruses in a Non-Model Organism. Computation. 2014;2:221–45.
- 834 54. Kamath PL, Poss M, Elleder D, Powell JH, Bao L, Cross PC. The Population  
835 History of Endogenous Retroviruses in Mule Deer ( *Odocoileus hemionus* ) . J Hered.  
836 2013;105:173–87.
- 837 55. Fábryová H, Hron T, Kabíčková H, Poss M, Elleder D. Induction and  
838 characterization of a replication competent cervid endogenous gammaretrovirus  
839 (CrERV) from mule deer cells. Virology. 2015;485:96–103.
- 840 56. Chaisson MJP, Huddleston J, Dennis MY, Sudmant PH, Malig M, Hormozdiari F, et  
841 al. Resolving the complexity of the human genome using single-molecule sequencing.  
842 Nature. Nature Publishing Group; 2015;517:608–11.
- 843 57. Gregory TR. Animal Genome Size Database. 2019.
- 844 58. Vinogradov AE. Genome size and GC-percent in vertebrates as determined by flow  
845 cytometry: The triangular relationship. Cytometry. 1998;31:100–9.
- 846 59. Kim J, Larkin DM, Cai Q, Asan, Zhang Y, Ge R-L, et al. Reference-assisted  
847 chromosome assembly. Proc Natl Acad Sci U S A. 2013;110:1785–90.
- 848 60. Gallagher DS, Derr JN, Womack JE. Chromosome conservation among the  
849 advanced pecorans and determination of the primitive bovid karyotype. J Hered.  
850 1994;85:204–10.

- 851 61. Cantarel BL, Korf I, Robb SMC, Parra G, Ross E, Moore B, et al. MAKER: an easy-  
852 to-use annotation pipeline designed for emerging model organism genomes. *Genome*  
853 *Res.* 2008;18:188–96.
- 854 62. Holt C, Yandell M. MAKER2: an annotation pipeline and genome-database  
855 management tool for second-generation genome projects. *BMC Bioinformatics. BioMed*  
856 *Central Ltd*; 2011;12:491.
- 857 63. Benit L, Dessen P, Heidmann T. Identification, Phylogeny, and Evolution of  
858 Retroviral Elements Based on Their Envelope Genes. *J Virol.* 2001;75:11709–19.
- 859 64. Hunter DR, Bao L, Poss M. Assignment of endogenous retrovirus integration sites  
860 using a mixture model. *Ann Appl Stat.* 2017;11:751–70.
- 861 65. Gifford RJ, Katzourakis A, De Ranter J, Magiorkinis G, Belshaw R. Env-less  
862 endogenous retroviruses are genomic superspreaders. *Proc Natl Acad Sci.*  
863 2012;109:7385–90.
- 864 66. MAGER DL, FREEMAN JD. HERV-H Endogenous Retroviruses: Presence in the  
865 New World Branch but Amplification in the Old World Primate Lineage. *Virology.*  
866 1995;213:395–404.
- 867 67. Suspène R, Sommer P, Henry M, Ferris S, Guétard D, Pochet S, et al. APOBEC3G  
868 is a single-stranded DNA cytidine deaminase and functions independently of HIV  
869 reverse transcriptase. *Nucleic Acids Res.* 2004;32:2421–9.
- 870 68. Rebollo R, Romanish MT, Mager DL. Transposable Elements: An Abundant and  
871 Natural Source of Regulatory Sequences for Host Genes. *Annu Rev Genet.*  
872 2012;46:21–42.
- 873 69. Zheng Y-H, Jeang K-T, Tokunaga K. Host restriction factors in retroviral infection:

- 874 promises in virus-host interaction. *Retrovirology*. 2012;9:112.
- 875 70. Duggal NK, Emerman M. Evolutionary conflicts between viruses and restriction  
876 factors shape immunity. *Nat Rev Immunol*. 2012;12:687–95.
- 877 71. Daugherty MD, Malik HS. Rules of Engagement: Molecular Insights from Host-Virus  
878 Arms Races. *Annu Rev Genet*. 2012;46:677–700.
- 879 72. Campbell IM, Gambin T, Dittwald P, Beck CR, Shuvarikov A, Hixson P, et al.  
880 Human endogenous retroviral elements promote genome instability via non-allelic  
881 homologous recombination. *BMC Biol*. 2014;12:74.
- 882 73. Cohen CJ, Lock WM, Mager DL. Endogenous retroviral LTRs as promoters for  
883 human genes: A critical assessment. *Gene*. 2009;448:105–14.
- 884 74. Maksakova IA, Romanish MT, Gagnier L, Dunn CA, van de Lagemaat LN, Mager  
885 DL. Retroviral elements and their hosts: insertional mutagenesis in the mouse germ  
886 line. *PLoS Genet*. 2006;2:e2.
- 887 75. Lu X, Sachs F, Ramsay L, Jacques P-É, Göke J, Bourque G, et al. The retrovirus  
888 HERVH is a long noncoding RNA required for human embryonic stem cell identity. *Nat*  
889 *Struct Mol Biol*. Nature Publishing Group; 2014;21:423–5.
- 890 76. Kawasaki J, Nishigaki K. Tracking the Continuous Evolutionary Processes of an  
891 Endogenous Retrovirus of the Domestic Cat: ERV-DC. *Viruses*. 2018;10:179.
- 892 77. Bénit L, De Parseval N, Casella JF, Callebaut I, Cordonnier A, Heidmann T. Cloning  
893 of a new murine endogenous retrovirus, MuERV-L, with strong similarity to the human  
894 HERV-L element and with a gag coding sequence closely related to the Fv1 restriction  
895 gene. *J Virol*. 1997;71:5652–7.
- 896 78. Finnerty H, Mi S, Veldman GM, McCoy JM, LaVallie E, Edouard P, et al. Syncytin is

- 897 a captive retroviral envelope protein involved in human placental morphogenesis.  
898 Nature. 2002;403:785–9.
- 899 79. Murin CD, Wilson IA, Ward AB. Antibody responses to viral infections: a structural  
900 perspective across three different enveloped viruses. Nat Microbiol. 2019;4:734–47.
- 901 80. Stamatatos L, Morris L, Burton DR, Mascola JR. Neutralizing antibodies generated  
902 during natural HIV-1 infection: good news for an HIV-1 vaccine? Nat Med. 2009;15:866–  
903 70.
- 904 81. Evans LH, Alamgir ASM, Owens N, Weber N, Virtaneva K, Barbian K, et al.  
905 Mobilization of Endogenous Retroviruses in Mice after Infection with an Exogenous  
906 Retrovirus. J Virol. 2009;83:2429–35.
- 907 82. Hanafusa H. Analysis of the defectiveness of rous sarcoma virus III. Determining  
908 influence of a new helper virus on the host range and susceptibility to interference of  
909 RSV. Virology. 1965;25:248–55.
- 910 83. Dewannieux M, Dupressoir A, Harper F, Pierron G, Heidmann T. Identification of  
911 autonomous IAP LTR retrotransposons mobile in mammalian cells. Nat Genet.  
912 2004;36:534–9.
- 913 84. Halo J V., Pendleton AL, Jarosz AS, Gifford RJ, Day ML, Kidd JM. Origin and recent  
914 expansion of an endogenous gammaretroviral lineage in domestic and wild canids.  
915 Retrovirology. 2019;16:6.
- 916 85. Ali L, Rizvi T, Mustafa F. Cross- and Co-Packaging of Retroviral RNAs and Their  
917 Consequences. Viruses. 2016;8:276.
- 918 86. Kozak C. Origins of the Endogenous and Infectious Laboratory Mouse  
919 Gammaretroviruses. Viruses. 2014;7:1–26.



- 920 87. Bamunusinghe D, Naghashfar Z, Buckler-White A, Plishka R, Baliji S, Liu Q, et al.  
921 Sequence Diversity, Intersubgroup Relationships, and Origins of the Mouse Leukemia  
922 Gammaretroviruses of Laboratory and Wild Mice. Beemon KL, editor. *J Virol*.  
923 2016;90:4186–98.
- 924 88. Löber U, Hobbs M, Dayaram A, Tsangaras K, Jones K, Alquezar-Planas DE, et al.  
925 Degradation and remobilization of endogenous retroviruses by recombination during the  
926 earliest stages of a germ-line invasion. *Proc Natl Acad Sci*. 2018;115:8609–14.
- 927 89. Luo R, Liu B, Xie Y, Li Z, Huang W, Yuan J, et al. SOAPdenovo2: an empirically  
928 improved memory-efficient short-read de novo assembler. *Gigascience*. 2012;1:18.
- 929 90. Li H, Durbin R. Fast and accurate short read alignment with Burrows-Wheeler  
930 transform. *Bioinformatics*. 2009;25:1754–60.
- 931 91. Trapnell C, Pachter L, Salzberg SL. TopHat: discovering splice junctions with RNA-  
932 Seq. *Bioinformatics*. 2009;25:1105–11.
- 933 92. Kim D, Pertea G, Trapnell C, Pimentel H, Kelley R, Salzberg SL. TopHat2: accurate  
934 alignment of transcriptomes in the presence of insertions, deletions and gene fusions.  
935 *Genome Biol*. BioMed Central Ltd; 2013;14:R36.
- 936 93. Kent WJ. BLAT---The BLAST-Like Alignment Tool. *Genome Res*. 2002;12:656–64.
- 937 94. Harris RS. Improved pairwise alignment of genomic DNA. The Pennsylvania State  
938 University; 2007.
- 939 95. Bininda-Emonds ORP, Cardillo M, Jones KE, MacPhee RDE, Beck RMD, Grenyer  
940 R, et al. The delayed rise of present-day mammals. *Nature*. 2007;446:507–12.
- 941 96. Edgar RC. MUSCLE: Multiple sequence alignment with high accuracy and high  
942 throughput. *Nucleic Acids Res*. 2004;32:1792–7.

- 943 97. Löytynoja A, Goldman N. An algorithm for progressive multiple alignment of  
944 sequences with insertions. *Proc Natl Acad Sci U S A*. 2005;102:10557–62.
- 945 98. Posada D. jModelTest: phylogenetic model averaging. *Mol Biol Evol*. 2008;25:1253–  
946 6.
- 947 99. Bouckaert R, Heled J, Kühnert D, Vaughan T, Wu C-H, Xie D, et al. BEAST 2: a  
948 software platform for Bayesian evolutionary analysis. *PLoS Comput Biol*.  
949 2014;10:e1003537.
- 950 100. Guindon S, Gascuel O. A simple, fast, and accurate algorithm to estimate large  
951 phylogenies by maximum likelihood. *Syst Biol*. 2003;52:696–704.

952

### 953 **Figure legends**

954

955 **Figure 1. Diagram of CrERV reconstruction and RACA.** (A) Mule deer chromosome  
956 fragment reconstruction using syntenic fragments. Gray, green and blue boxes  
957 correspond to aligned human, cow and mule deer scaffold respectively. Lighter shades  
958 represent regions that can only be aligned between two species. Dashed boxes  
959 highlight syntenic fragments where the region is conserved among all three species,  
960 which yield a chromosome fragment that orients mule deer scaffolds. (B)  
961 Reconstruction of CrERV sequences. CrERV and mule deer scaffolds are shown in bold  
962 orange and blue boxes, respectively. Long insert mate pair reads are connected by  
963 dotted lines and are colored to indicate whether they derive from the mule deer scaffold  
964 or CrERV genome. CrERV genomes were assembled by gathering the broken mate  
965 pairs surrounding each CrERV loci as described.

966

967 **Figure 2. Coalescent phylogeny, *env* structural variation and population**  
968 **frequency of representative full-length non-recombinant CrERVs.** Nodes with at  
969 least 95% posterior probability support are marked by black dots. The high posterior  
970 density for each labeled node is shown in Table S6. Boxes next to CrERV names  
971 display the frequency of the CrERVs in the mule deer population with a gray scale  
972 (annotated at the top-left corner). Diagrams on the right side depict the lineage-specific  
973 structural variations in the CrERV envelope gene. White triangles represent insertions  
974 (A, B, C), and white rectangles represent deletions (D and E).

975

976 **Figure 3. Recombination among CrERVs.** Shown is a maximum likelihood  
977 phylogeny based on a region spanning a portion of *pol* to 5' *env* (JN592050: 4422-7076).  
978 Taxa used are a subset of full-length non-recombinant CrERVs representing the four  
979 lineages shown in Figure 2 and CrERVs with a recombinant signature containing a  
980 Lineage B *env*. Supported nodes (aLRT  $\geq$  0.85) are represented by black dots on the  
981 backbone of the tree. Lineage designation is assigned to supported branches based on  
982 the non-recombinant CrERV. Over this interval, Lineage B CrERVs are found as a sister  
983 group to lineage A CrERV but some CrERV containing a prototypical Lineage B *env* are  
984 dispersed among Lineage A CrERV. Note that in this interval lineage C CrERVs cluster  
985 with Lineage A CrERVs.

986

987 **Figure 4. CrERV insertions are enriched within 20 kbp of genes and depleted in**  
988 **introns.** We simulated the expected number of CrERV insertions by randomly placing

989 them on the *de novo* assembled MT273 genome. The proportion of insertions expected  
990 within 20kb of a gene from the 10,000 replicates is shown in Panel A. The proportion of  
991 intronic insertions is in panel B. The distribution of insertions within 20kb of a gene or an  
992 intron from the simulation is shown as a histogram. Blue dashed lines indicate the mean  
993 of the simulated data. Red dashed lines indicate the observed data in MT273. Black  
994 dashed lines indicate the 5th and 95th percentile of the simulated data, which are used  
995 to call significant differences.

996

### 997 **Additional files**

998

999 **Figure S1. *K-mer* representation of missing data in assemblies.** *60-mers* were  
1000 generated from the raw paired-end WGS, then ranked and classified into 20 bins  
1001 containing equal number of *60-mers*. Sorted by the *60-mer* frequency range, bars  
1002 represent genome repeats from high copy number (left) to low copy number (right).  
1003 Color bars show percent of all *60-mers* present in the scaffolds/contigs (blue),  
1004 RACA10K (green), and RACA150K (red) assemblies. *K-mer* counts were based on the  
1005 total number of *k-mers* (*k-mer* of frequency *n* were counted *n* times). *K-mers* in the raw  
1006 sequencing data were normalized based on sequencing depth, genome ploidy, read  
1007 length and *k-mer* length, so that the *k-mer* fractions reflect the proportion of *k-mers* that  
1008 are present in each assembly compared to the raw sequencing data. All bars start from  
1009 0% instead of being stacked. Numbers beneath each bar indicates the range of  
1010 frequency of *60-mers* in the raw paired-end genome sequencing data in that bin. M:  
1011 million, K: thousand.

1012

1013 **Figure S2. Diagram of CrERV recombination breakpoints.** Gray lines point at the  
1014 key recombination breakpoints on the CrERV. Text box connected to the gray lines  
1015 indicate the coordinate and adjusted p-value of the breakpoint. Solid gray lines indicate  
1016 breakpoints of recombinant lineages; dashed gray lines indicate additional breakpoints  
1017 detected by testing the alignment of reference non-recombinant and candidate  
1018 recombinant CrERVs. All coordinates are relative to GenBank entry JN592050. Double  
1019 star (\*\*) indicates breakpoints used in the Lineage B recombinant analysis.

1020

1021 **Figure S3. Distribution of simulated mean distance to gene per replicate in mule**  
1022 **deer, cow and human genome.** Distribution of mule deer, cow and human are colored  
1023 in red, green and blue respectively. Mann-Whitney U test p-values in all three  
1024 comparisons are less than  $2.2 \times 10^{-16}$ .

1025

1026 **Table S1. de novo and RACA assembly statistics.** As the resolution increases,  
1027 scaffolds can be placed into less chromosome fragments at the expense of less  
1028 scaffolds incorporated. PE: paired-end sequencing. MP: long insert mate pair  
1029 sequencing. N50: length of the shortest contig at 50% of the total genome length, a  
1030 measurement of assembly contiguity. RACA: reference-assisted chromosome  
1031 assembly. RACA assembly size: total size of RACA chromosome fragments at given  
1032 RACA resolution.

1033

1034 **Table S2. Scaffold assignment to RACA chromosome fragments.** The tab  
1035 "RACA10K" corresponds to the RACA at 10 Kbp resolution, and "RACA150K"  
1036 corresponds to 150 Kbp resolution. "R150K.R10K.CowChain10KSort" contains the  
1037 chromosome fragment assignment information of both RACA150K (column A-G) and  
1038 RACA10K (column H-N), sorted by the scaffolds' alignment chain (column O-V) to the  
1039 cow genome, with column W indicating the genes that are present on the scaffold.  
1040 Similarly, "R150K.R10K.SheepChain10KSort" represents scaffold assignments to  
1041 RACA150K and RACA10K chromosome fragments along the sheep genome.

1042

1043 **Table S3. Number of gene structures annotated after each maker annotation.** Each  
1044 column represents a Maker iteration by their order.

1045

1046 **Table S4. Summary of *k*-mers with > 50 frequency.** Numbers outside of parentheses  
1047 show the cumulative frequency of *k*-mers with >50 frequency belonging to each repeat  
1048 family. Given the read length of 100 bp and *k*-mer size of 60, frequency of >50 in the  
1049 whole genome sequencing library corresponds to >4 copies in the genome. Percentage  
1050 in parentheses show the fraction of *k*-mers of the repeat family that are present in each  
1051 assembly denominated by the total of that family in the raw paired-end sequencing  
1052 library.

1053

1054 **Table S5. Inventory of CrERVs used in phylogenetic analysis.** Column A: CrERV  
1055 names, by scaffold number. Multiples CrERVs on the same scaffold are discerned by  
1056 additional character after scaffold numbers. Column B: Lineage designation, consistent

1057 with assignments mentioned in text and Figure 2. B1 and B2 are the two lineages that  
1058 are closely related to lineage B but have a different type of env. Bold font of lineage A  
1059 indicates the sub-lineage that are significantly closer to genes. Column C: Env status,  
1060 as illustrated in Figure 2. A, B: insertion; D, E: deletion; C: insertion and deletion; M:  
1061 missing data for the corresponding insertion or deletion. Column D: Inter-lineage  
1062 recombination status. Text indicates the recombination partner and section. Empty cell  
1063 means no recombination was detected. Column E: Assignment to RACA10K  
1064 chromosome fragment (also refer to Table S2). Parentheses mean that they are not on  
1065 RACA10K and provisionally assigned by being the closest to sheep or cow alignmt  
1066 chain. Column F: Frequency in all 63 animals used by Bao et al. 2014, using  $\geq 0.95$   
1067 probability cutoff. The repetitive junction fragments (multiple mapping) are designated  
1068 'uncertain' and their frequency in the probability table was listed in the parenthesis. Bold  
1069 font indicates the singletons. Column G: Distance to the closest gene. 'NA' means that  
1070 the virus-containing scaffold cannot be assigned to RACAs and no genes can be found  
1071 on the CrERV-containing scaffold. Negative value means intronic insertion. Bold font  
1072 indicates recombinant CrERVs (Figure 3) that are close to genes. Column H: Presence  
1073 in Figure 2, with letter in parenthesis representing the node it corresponds to.

1074

1075 **Table S6. Intervals for the 95% highest probability density (HPD) intervals for key**  
1076 **nodes in Figure 2.**

1077

1078 **Table S7. Sequences used for recombination breakpoint tests and results of the**  
1079 **tests.** (A) List of reference non-recombinant CrERVs used for each lineage. (B)

1080 Summary of recombination breakpoint tests. Statistically significant breakpoints  
1081 (adjusted  $p < 0.01$ ) are shown. Breakpoint coordinates are based on GenBank  
1082 JN592050.

1083

1084 **File S1. Supplementary analyses and methods.**

1085

1086 **File S2. Reconstructed CrERV sequences used in phylogenetic analyses.** The file  
1087 is in fasta format. CrERVs are named after the scaffold they came from, as listed in  
1088 Table S5.

1089



**A.**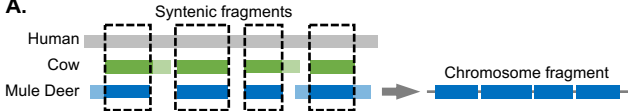**B.**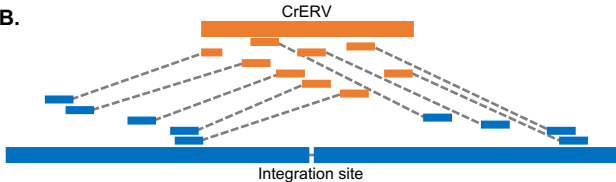

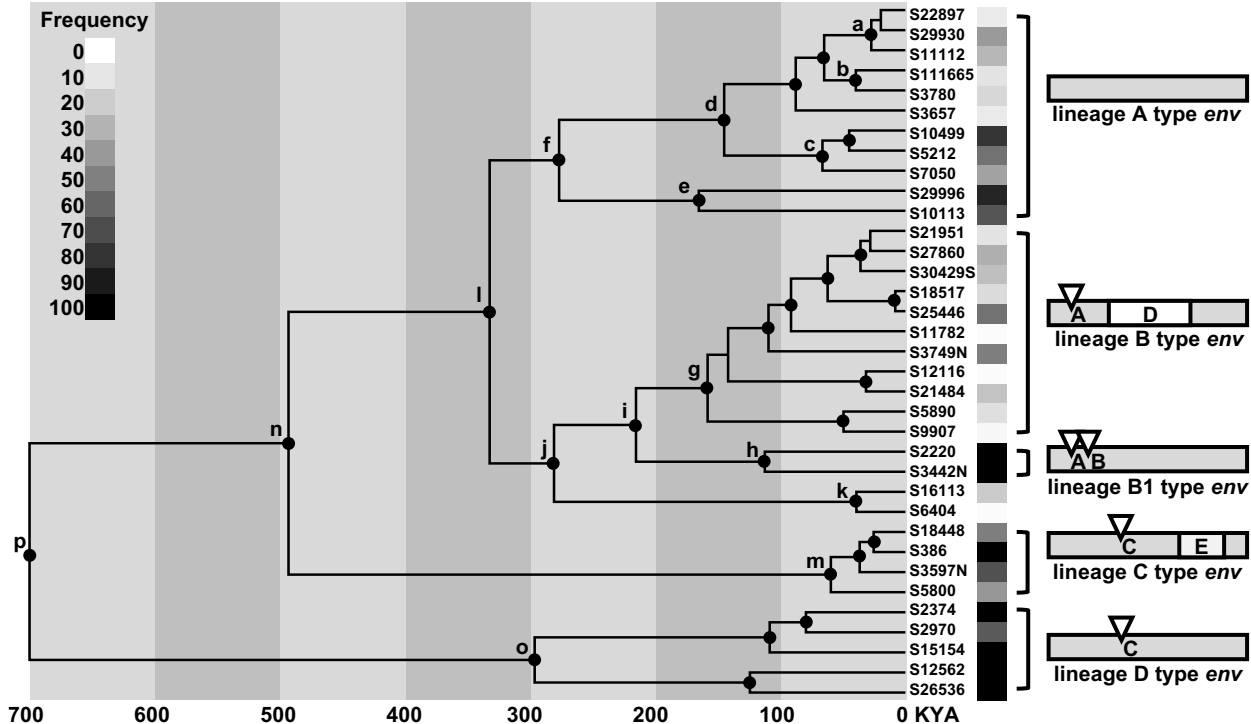

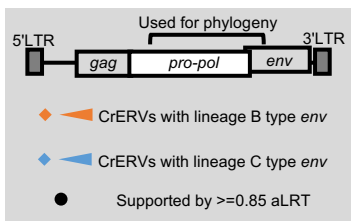

- ◆ CrERVs with lineage B type *env*
- ◆ CrERVs with lineage C type *env*
- Supported by  $\geq 0.85$  aLRT

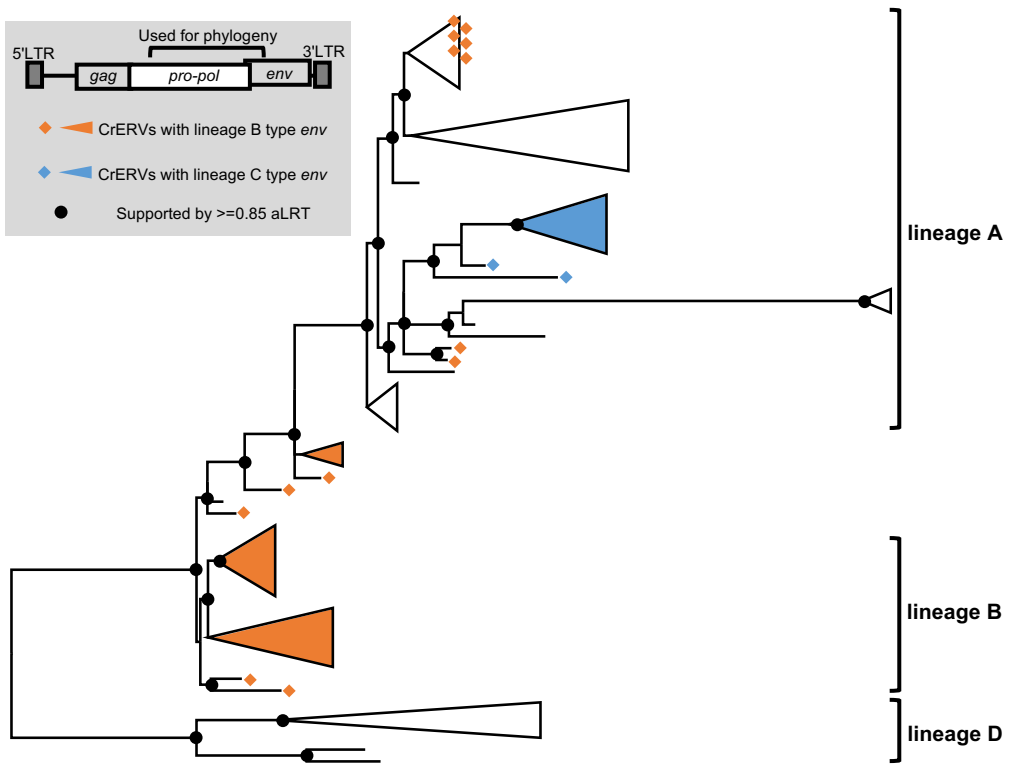

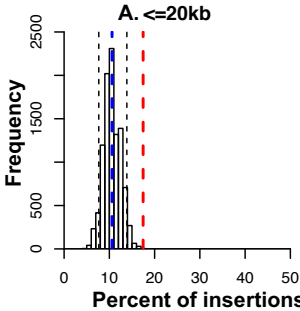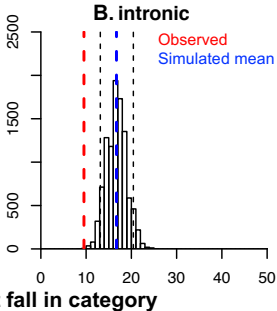

Source: http://biorxiv.org/content/10.1101/2021.02.24.432774v1.full.pdf
